# Supplementary material for: Achieving Net Zero Carbon Dioxide by Sequestering Biomass Carbon
Source: Preprints.org preprint supplement (doi:10.20944/preprints202007.0576.v2), 2020-08-05
Supplement: Supplementary file 3 [file SI Text.docx]

SUPPLEMENTAL INPUT

Achieving Net Zero Carbon Dioxide By Sequestering Biomass Carbon

Jeffrey A. Amelse 1,2

1 CICECO, Aveiro Institute of Materials, Department of Chemistry, University of Aveiro, 3810-193

Aveiro, Portugal; JAmelse@UA.Pt;

2 Independent Contributor, Batavia, IL 60510 USA; AmelseJeff@Gmail.com

Received: date; Accepted: date; Published: date

**SI.1. Calculation of the Amount of Air With 400 ppmv CO2 Needed to Feed the Growth of 1 Acre of Corn**

The calculation is provided in the spreadsheet attached below. It takes about 0.85 acres of air from sea level to the end of the troposphere to feed the growth of 1 acre of corn.

**SI.2. EXCEL files that Calculate Urban Tree Growth Parameters in 10 Year Increment**s

EXCEL files that calculate tree growth parameters from the allometric equations provided in the USDA report [39].

| 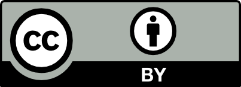 | © 2020 by the authors. Submitted for possible open access publication under the terms and conditions of the Creative Commons Attribution (CC BY) license (http://creativecommons.org/licenses/by/4.0/). |
| --- | --- |
